# Supplementary material for: Mechanical strength of PLA parts manufactured by FDM using RSM and fuzzy logic
Source: publisher site journal article supplement (doi:10.1515/mt-2025-0307), 2025-12-03
Supplement: Supplementary file 1 [file j_mt-2025-0307_suppl_002.docx]

**Author Data**

|  |  | Issue |  | Managing Editor |  |
| --- | --- | --- | --- | --- | --- |
| Title | Experimental Evaluation and Optimization of Mechanical Strength of PLA Parts Manufactured by FDM Using RSM and Fuzzy Logic | | | | |
| Keywords | Fused deposition modeling, printing parameter optimization, response surface methodology, fuzzy logic, polylactic acid. | | | | |
| Author(s) | Erman Zurnacı, Faik Cüneyd Alıcıoğlu | | | | |
| Affiliation and Address of Corresponding Author | Department of Mechanical Engineering, Faculty of Engineering and Architecture, Kastamonu University, Kastamonu, Türkiye | | | | |
| Tel. | +90366 280 29 23 | | | | |
| Fax |  | | | | |
| E-Mail | ermanzurnaci@kastamonu.edu.tr | | | | |

| Affiliation and Address of First Author | Department of Mechanical Engineering, Faculty of Engineering and Architecture, Kastamonu University, Kastamonu, Türkiye |
| --- | --- |
| Affiliation and Address of Second Author | Department of Mechanical Engineering, Institute of Science, Kastamonu University, Kastamonu, Türkiye |
| Affiliation and Address of Third Author |  |
| Affiliation and Address of Forth Author |  |
| Affiliation and Address of Fifth Author |  |
| Affiliation and Address of Sixth Author |  |
| Affiliation and Address of Seventh Author |  |

*Please tick as appropriate*

| **Procedure** | First enquiry of publication of a paper with abstract attached  Submission of the full paper with all required files attached  Paper by open submission or received by assignment  X Paper acquired by or submitted by request of managing editor | |
| --- | --- | --- |
| **Author´s instructions** | **X** Authors have read the author´s instructions and the paper has consistently been prepared in line with these (or Editor adjusted paper to the author´s instructions) | The paper is not totally in line with the author´s instructions. Please, specify why |
| **Language** | **X** The paper is written in very proper English | The manuscript has been proof-read by a native speaker |
| **Citation records** | Authors have already cited more than five papers from Materials Testing in other referenced journals  Authors have cited less than five papers from Materials Testing in other referenced journals  Authors have not yet cited any papers from Materials Testing in other referenced journals | **X** Authors have cited more than five other papers from Materials Testing in this paper  Authors have cited less than five other papers from Materials Testing papers in this paper  Authors have not cited any other papers from Materials Testing papers in this paper |
| **Originality** | Similar papers or parts published by the author(s) or others, please state the extant and the type of publication | **X** The paper or any parts have not yet been submitted to and has not been rejected by any other journal |
|  | **X** Unaware of similar papers | **X** Author declares originality of the work  **X** Author ensures to obtain the copyright for each table, especially each figure and the text and to transfer this for publication by Hanser |

Letter to the Editor (including three good reasons why the paper should be published in Materials Testing)

We are pleased to submit our original research article entitled "Experimental Evaluation and Optimization of Mechanical Strength of PLA Parts Manufactured by FDM Using RSM and Fuzzy Logic" for consideration in Materials Testing.

This study investigates the influence of key FDM process parameters (raster angle, infill type, and infill density) on the mechanical performance of PLA parts, specifically focusing on ultimate tensile strength (UTS) and impact strength (IS). An experimental setup based on an L18 orthogonal design was developed, and standardized mechanical testing was conducted. To predict and optimize these mechanical properties, we employed both Response Surface Methodology (RSM) and Fuzzy Logic (FL). Our findings indicate that RSM delivers more accurate results compared to FL, providing a valuable framework for mechanical performance prediction in 3D printing.

We believe this study aligns well with the scope of Materials Testing, as it combines experimental mechanics, materials characterization, and advanced modeling techniques. Furthermore, I would like to note that I have previously published in your journal with the article titled "Evaluation of corrugated core configuration effects on low-velocity impact response in metallic sandwich panels."

The manuscript is original, has not been published before, and is not under consideration elsewhere. All authors have read and approved the final version, and there are no conflicts of interest.

Thank you for considering our manuscript. We look forward to your feedback.

Sincerely,

Dr. Erman ZURNACI
